# Supplementary material
Source: Springer Nature journal article supplement (https://www.springermedizin.de/resource/supplementary/12985_2011_1744_MOESM4_ESM.pdf/9611008)

*Polyomavirus analysis software modules*

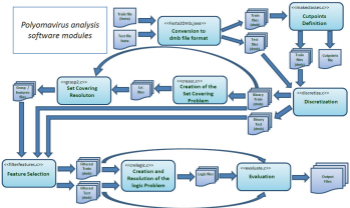

Supplement: MOESM4 [file 9611008]
